# Supplementary material for: One-pot noncovalent method to functionalize multi-walled carbon nanotubes using cyclomatrix-type polyphosphazenes
Source: Royal Society of Chemistry journal article supplement (doi:10.1039/b818071g), 2008-12-22
Supplement: b818071g.pdf [file b818071g.pdf]

Supporting Information

**One-pot noncovalent method to functionalize multi-walled carbon nanotubes  
using cyclomatrix-type polyphosphazenes**

Jianwei Fu, Xiaobin Huang,\* Yawen Huang, Jiawei Zhang and Xiaozhen Tang\*

**Experimental Materials**

Hexachlorocyclotriphosphazene (HCCP) (Aldrich) was recrystallized from dry hexane followed by sublimation (60 °C, 0.05 mmHg) twice before use (mp = 112.5–113 °C). 4,4'-Sulfonyldiphenol (BPS) (purity >99.5%) was obtained from Jiangsu Alonda High-Tech Industry Co., Ltd. (Jiangsu, China) and used as received. Multi-walled carbon nanotubes (CNTs) were obtained from Tsinghua Nafine Nano-Powder Commercialization Engineering Centre (with an average diameter of about 11 nm and a purity of 98%). Tetrahydrofuran, **ethanol** and triethylamine (TEA) was purchased from Shanghai Chemical Reagents Corp. (Shanghai, China) and used without further purification.

**Characterization**

The FTIR measurements were conducted on a Perkin-Elmer Paragon 1000 Fourier transform spectrometer at room temperature. SEM measurement was carried out with a JEOL JSM-7401F field-emission microscopy. SEM samples were diluted 20 times with **ethanol** and then deposited on glass substrates. Transmission electron microscopy (TEM) and energy-dispersive X-ray spectroscopy (EDX) were performed

with a JEOL JEM-2010 microscope operated at 100 kV. The X-ray diffraction (XRD) pattern was recorded on a powder sample using a Bruker D8 Advance instrument with Cu K $\alpha$  radiation at a scanning rate of 6 degrees per minute in  $2\theta$  ranging from 10 to 60°. Elemental analyses were performed using a Perkin Elmer 2400-II.

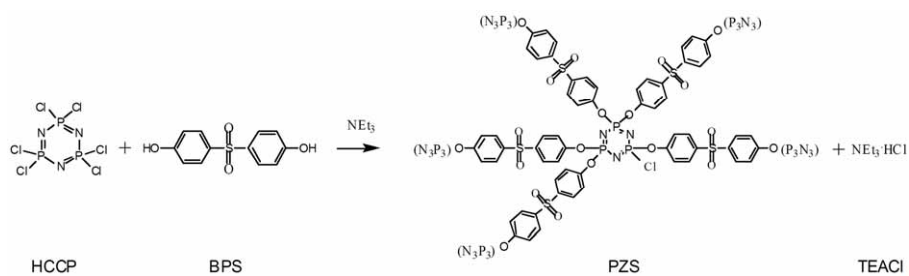

**Fig. S1.** The polycondensation of comonomers HCCP and BPS and the organic-inorganic hybrid cross-linked structure of the PZS product as shell of nanocables. (P<sub>3</sub>N<sub>3</sub>) indicates other phosphazene cores.

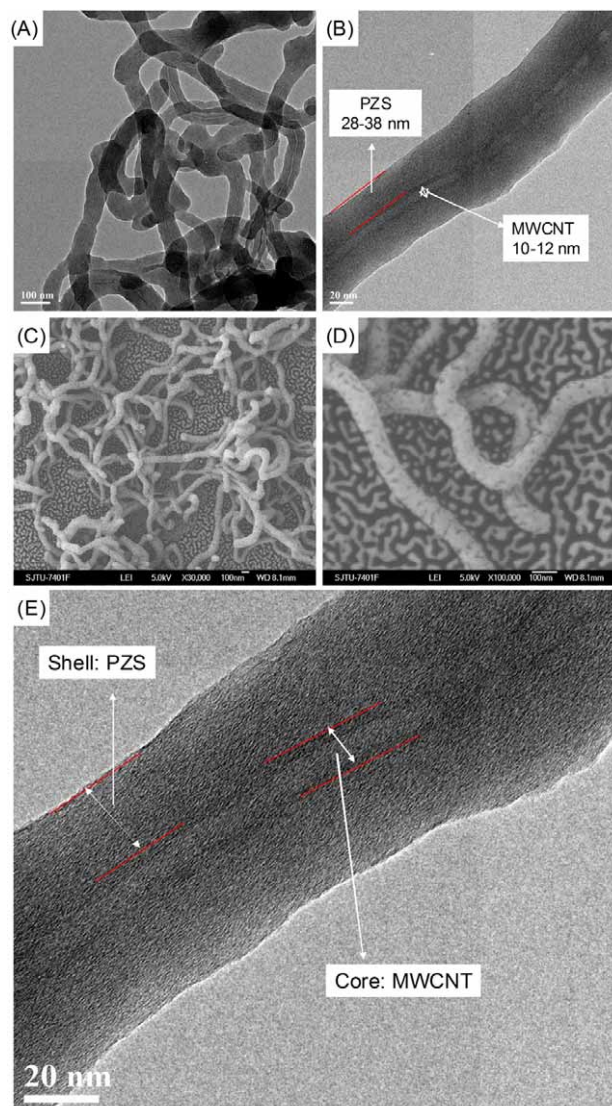

**Fig. S2** Typical TEM (A, B) and SEM (C, D) images of the MWCNT/PZS nanocables prepared at the mass ratio of MWCNT: HCCP: BPS=1: 10: 24. By controlling the ratio, we could easily tune the shell thickness of nanocables. (E) A magnified TEM image which shows a typical core/shell structure of MWCNT/PZS nanocable, and the relatively darker layers are the graphite sheets of MWCNTs.

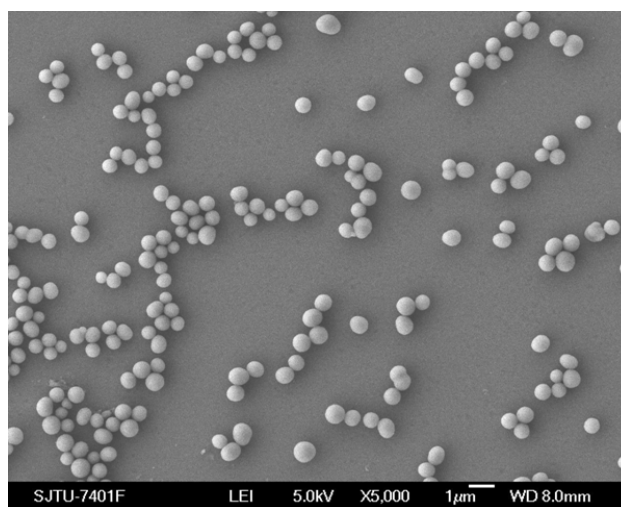

**Fig. S3** SEM image of PZS microspheres obtained in the absence of MWCNTs.
